# Supplementary material
Source: Springer Nature journal article supplement (https://www.springermedizin.de/resource/supplementary/12872_2014_756_MOESM1_ESM.pdf/9430428)

A

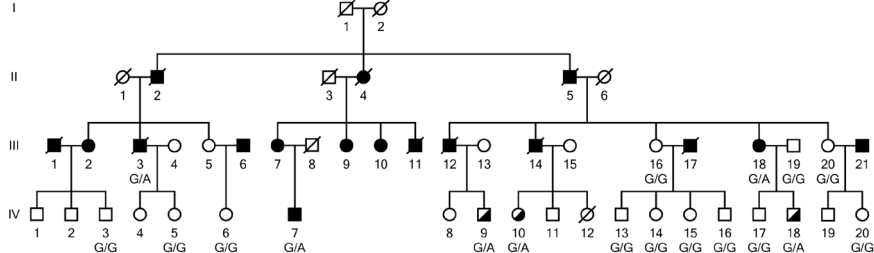

B

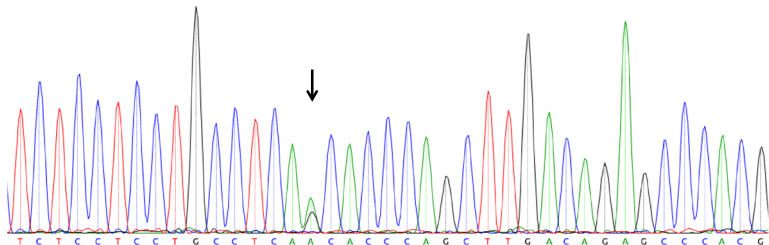

Supplement: MOESM1 [file 9430428]
